# Supplementary material for: Multi-criteria evaluation of suitable locations for temporary disaster waste storage sites: the case of Cavite, Philippines
Source: Springer Nature journal article supplement (doi:10.1007/s10163-023-01705-9), 2023-06-06
Supplement: MOESM1 [file 25457252]

### Appendix

Evaluation of selected temporary storage site candidates

| Candidate | Coordinates                   | Total Sum (out of 11) | Ownership                   | Relaxed/Failed Criteria      |
|-----------|-------------------------------|-----------------------|-----------------------------|------------------------------|
| CC-C1     | 14°29'9.69"N, 120°54'0.28"E   | 9                     | Private                     | C-A.4; C-A.6 (built-up area) |
| CC-C2     | 14°28'57.36"N, 120°53'44.72"E | 9                     | Public                      | C-A.4; C-A.6 (built-up area) |
| CC-C3     | 14°29'7.78"N, 120°53'43.06"E  | 9                     | Private                     | C-A.4; C-A.6 (built-up area) |
| CC-C4     | 14°29'2.56"N, 120°53'41.02"E  | 9                     | Private                     | C-A.4; C-A.6 (built-up area) |
| CC-C5     | 14°29'2.56"N, 120°53'39.62"E  | 9                     | Private                     | C-A.4; C-A.6 (built-up area) |
| CC-C6     | 14°29'14.72"N, 120°54'3.39"E  | 9                     | Private                     | C-A.4; C-A.6 (built-up area) |
| N-C1      | 14°25'13.36"N, 120°52'50.94"E | 11                    | Private <sup>a</sup>        | None                         |
| N-C2      | 14°25'20.36"N, 120°52'37.44"E | 11                    | Private <sup>a</sup>        | None                         |
| N-C3      | 14°25'30.33"N, 120°52'40.39"E | 10                    | Private                     | C-A.6 (built-up area)        |
| N-C4      | 14°25'29.79"N, 120°52'38.55"E | 10                    | Public/Private <sup>b</sup> | C-A.6 (built-up area)        |
| N-C5      | 14°25'51.88"N, 120°52'51.48"E | 10                    | Private                     | C-A.6 (built-up area)        |
| N-C6      | 14°26'17.43"N, 120°52'59.85"E | 10                    | Private                     | C-A.6 (built-up area)        |
| N-C7      | 14°26'14.63"N, 120°53'2.56"E  | 10                    | Private                     | C-A.6 (built-up area)        |
| K-C1      | 14°26'11.30"N, 120°54'31.76"E | 9                     | Private                     | C-A.6 (built-up area)        |
| K-C2      | 14°26'51.89"N, 120°55'29.41"E | 9                     | Private                     | C-A.4                        |
| K-C3      | 14°26'42.63"N, 120°55'36.04"E | 9                     | Private                     | C-A.4                        |
| K-C4      | 14°26'11.84"N, 120°53'23.72"E | 8                     | Private                     | C-A.4; C-A.6 (built-up area) |
| K-C5      | 14°26'59.42"N, 120°55'32.23"E | 8                     | Private                     | C-A.4; C-A.6 (built-up area) |

(a) The entire selected TSS candidates have multiple land owners.

(b) A portion of the TSS candidate is government-owned, and the rest is privately owned.
